# Supplementary material
Source: PubMed Central journal article supplement (PMC4565852)
Supplement: jcav06p1020s1.pdf [file jcav06p1020s1.pdf]

**Table S1:** Primary and secondary antibodies.

| Antibody                    | Catalogue Number | Purchased From                        |
|-----------------------------|------------------|---------------------------------------|
| Anti-DDR1                   | SC7554           | Santa Cruz Biotechnology, CA, USA     |
| Anti-DDR2                   | SC7553           |                                       |
| Anti-Type I procollagen;TIP | SC25973          |                                       |
| Anti-MMP-2                  | MAB 3308         | Milipore, MA, USA                     |
| Anti-MMP-9                  | MAB 3309         |                                       |
| Anti-MMP-8                  | PA1207           | Boster Biological Technology, CA, USA |
| Anti- $\beta$ -actin        | A-5316           | Sigma, USA                            |
| Anti rabbit IgG             | SH026            | ABM, Canada                           |
| Anti mouse IgG              | A5906            | Sigma, Germany                        |

**Table S2:** Primers used for RT-PCR.

| Accession Number | Symbol   | Primers                   |
|------------------|----------|---------------------------|
| NM_001002.3      | 36B4     | GCCAGCGAAGCCACGCTGCTGAAC  |
|                  |          | CGAACACCTGCTGGATGACCAGCCC |
| NM_005163        | AKT-1    | TCCCCCTCAGATGATCTCTCCA    |
|                  |          | CGGAAAGGTTAAGCGTCGAAAA    |
| NM_138578        | BCLX     | GTGTGAGGAGCTGCTGGCTTG     |
|                  |          | AGCATCAGGCCGTCCAATCTC     |
| NM_000088.3      | TIP      | CGGCTCCTGCTCCTCTTAG       |
|                  |          | TCTCCCTTGGGTCCCTCGA       |
| NM_001954        | DDR1     | GTGGAGATGGAGTTTGAGTTTGA   |
|                  |          | CTGCTGAAGTTGGTGGGAGG      |
| NM_006182        | DDR2     | CATTGAGATCATGTTTGAATTTGAC |
|                  |          | TACATTGCAGCATCTGATTGGAA   |
| NM_138957        | ERK1     | TCTCAAGATCTGTGACTTTGGC    |
|                  |          | CCCTTGGAATTCAACATAATTTCT  |
| NM_001278548     | JNK1     | CAAACCTTAAAGCCAGTCAGGCA   |
|                  |          | GTCAGGGATCTTTGGTGGT       |
| NM_033360.3      | K-RAS 4A | TGTGGTAGTTGGAGCTGGTG      |
|                  |          | TGACCTGCTGTGTCGAGAAT      |
| NM_004985.4      | K-RAS 4B | TACAGTGCAATGAGGGACCA      |
|                  |          | AGGCATCATCAACACCCTGT      |
| NM_002424.2      | MMP-8    | GTGACAATTCTCCATTTGATGGA   |
|                  |          | TCAAATCTTCATAAGCAGCCTG    |
| NM_139013        | p38      | GAAAATGTGATTGGTCTGTTGGA   |
|                  |          | CCATGAGATGGGTCAACCAG      |
| NM_139178        | PCA-1    | AAGGTGTGTATGAAATCAGCCTG   |
|                  |          | GTGAGGATTTGGTTCCATAGTGAT  |
| NM_002427.3      | MMP-13   | TTACCAGTCTCCGAGGAGAAAC    |
|                  |          | GATAACCTTCCAGAATGTCATAACC |
